# Supplementary material for: Heritability of Psychotic Experiences in Adolescents and Interaction With Environmental Risk
Source: PubMed Central journal article supplement (PMC9350848; doi:10.1001/jamapsychiatry.2022.1947), 2022-08-03
Supplement: jamapsychiatry-e221947-s001.pdf [file jamapsychiatry-e221947-s001.pdf]

## Supplementary Online Content

Taylor MJ, Freeman D, Lundström S, Larsson H, Ronald A. Heritability of psychotic experiences in adolescents and interaction with environmental risk. *JAMA Psychiatry*. Published online August 3, 2022.  
doi:10.1001/jamapsychiatry.2022.1947

**eTable 1.** Description of the Measures

**eTable 2.** Assumptions Testing

**eTable 3.** Twin Correlations

**eTable 4.** Model Fit Statistics

**eTable 5.** Univariate Model Estimates

**eTable 6.** Moderation Estimates

**eTable 7.** Estimates From the Moderation Models

### **eReferences**

This supplementary material has been provided by the authors to give readers additional information about their work.

**eTable 1.** Description of the Measures

| <b>Exposures</b>                |                                                                                                                                                                                                                                                                                                                                                                                                                                 |                                                                                                                                                                                                                                                                                                                                                                                                                                                                                                                                                                                                                                                                                                                 |                                          |
|---------------------------------|---------------------------------------------------------------------------------------------------------------------------------------------------------------------------------------------------------------------------------------------------------------------------------------------------------------------------------------------------------------------------------------------------------------------------------|-----------------------------------------------------------------------------------------------------------------------------------------------------------------------------------------------------------------------------------------------------------------------------------------------------------------------------------------------------------------------------------------------------------------------------------------------------------------------------------------------------------------------------------------------------------------------------------------------------------------------------------------------------------------------------------------------------------------|------------------------------------------|
| <b>Exposure</b>                 | <b>Measure in TEDS</b>                                                                                                                                                                                                                                                                                                                                                                                                          | <b>Measure in CATSS</b>                                                                                                                                                                                                                                                                                                                                                                                                                                                                                                                                                                                                                                                                                         | <b>Reference(s) Supporting Inclusion</b> |
| Bullying                        | Multidimensional Peer Victimization Scale at age 12, self-report. This includes 16 items. For each item, participants were asked 'How often during this school year has another pupil done these things to you?' They could answer 'Not at all' (scored as 0), 'once' (1), or 'more than once' (2). The 16 items were divided into four subscales: property destruction, physical abuse, verbal abuse, and social manipulation. | Olweus Bully/Victim Questionnaire at age 15, self-report. This includes 24, although only 16 were included in this study because the remaining eight items cover bullying perpetration. Participants are asked to rate how often particular forms of bullying have happened to them in the past two months, and can answer 'It has not happened to me in the past couple of months', 'only once or twice', '2 or 3 times a week', 'about once a week', or 'several times a week'. They are also asked how many students perpetrated the bullying ('mainly by 1', 'a group of 2-3', 'a group of 4-9', 'a group of 10 or more', or 'by several different students or groups of students') and how long it lasted. | <sup>1,2</sup>                           |
| Dependent Stressful Life Events | Coddington Life Events Record at age 16, self-report. An abbreviated version including 20 items was used. Only the ten items that related to dependent life events were included in this study. The checklist includes a list of life events, such as failure of an important exam, hospitalization, and becoming                                                                                                               | A list of life events was devised by the CATSS researchers. Of the 29 items completed by the twins at age 18, 13 related to dependent life events, such as death of a close friend or family member, and being the victim of a crime. For each event,                                                                                                                                                                                                                                                                                                                                                                                                                                                           | <sup>1,3,4</sup>                         |

|                                              |                                                                                                                                                                                                                                                                   |                                                                                                                                                                                                                 |                                                                                                                                                                                                                                                                                                                                              |
|----------------------------------------------|-------------------------------------------------------------------------------------------------------------------------------------------------------------------------------------------------------------------------------------------------------------------|-----------------------------------------------------------------------------------------------------------------------------------------------------------------------------------------------------------------|----------------------------------------------------------------------------------------------------------------------------------------------------------------------------------------------------------------------------------------------------------------------------------------------------------------------------------------------|
|                                              | involved with drugs. Participants could respond 'yes' or 'no' to each item. We did not account for how stressful each event was rated as.                                                                                                                         | participants answered either 'it has happened' or 'it has not happened'.                                                                                                                                        |                                                                                                                                                                                                                                                                                                                                              |
| Tobacco Use                                  | A questionnaire about substance and drug use was sent to the TEDS participants. For each drug or substance, they were asked to report whether they had ever tried it or not. One item concerned tobacco.                                                          | As for TEDS, a questionnaire was devised and included an item about whether participants had ever tried tobacco or not.                                                                                         | 5,6                                                                                                                                                                                                                                                                                                                                          |
| Cannabis Use                                 | The same questionnaire used to assess tobacco use also included an item about cannabis use.                                                                                                                                                                       | The same questionnaire used to assess tobacco use also included an item about cannabis use.                                                                                                                     | 7-9                                                                                                                                                                                                                                                                                                                                          |
| Birth Weight                                 | When the parents of the twins in TEDS were first contacted, they were asked to complete a questionnaire which provided background and demographic information, as well as some items about perinatal factors. Parents reported the twins' birth weights in grams. | Birth weight was derived by linking CATSS with the Medical Birth Register, which records all births in Sweden since 1973. Information about birth weight is recorded (in grams) when a new birth is registered. | 5                                                                                                                                                                                                                                                                                                                                            |
| <b>Psychotic Experiences</b>                 |                                                                                                                                                                                                                                                                   |                                                                                                                                                                                                                 |                                                                                                                                                                                                                                                                                                                                              |
| <b>Measure</b>                               | <b>Rater</b>                                                                                                                                                                                                                                                      | <b>N Items</b>                                                                                                                                                                                                  | <b>Description of Items</b>                                                                                                                                                                                                                                                                                                                  |
| SPEQ Paranoia <sup>10</sup>                  | Self-Report                                                                                                                                                                                                                                                       | 15                                                                                                                                                                                                              | Participants are asked 'Have you often thought...?' and then asked to respond to the items. The items enquire about feeling like others are deliberately trying to cause participants' harm, feeling as though being spied on or watched, and receiving coded messages from the television or internet. Responses are on a 0-5 Likert scale. |
| SPEQ Hallucinations <sup>11</sup>            | Self-Report                                                                                                                                                                                                                                                       | 9                                                                                                                                                                                                               | Participants are asked 'How often do you...?' and then provided with items about different hallucinations. These include hearing, seeing, or smelling things that others cannot, as well as experiencing unusual sensations that cannot be explained. Responses are on a 0-5 Likert scale.                                                   |
| SPEQ Cognitive Disorganisation <sup>12</sup> | Self-Report                                                                                                                                                                                                                                                       | 11                                                                                                                                                                                                              | Participants are asked to answer the questions based on their feelings in the past month. These include daydreaming, confusion                                                                                                                                                                                                               |

|                                      |               |    |                                                                                                                                                                                                                                                                                                                                                                                                       |
|--------------------------------------|---------------|----|-------------------------------------------------------------------------------------------------------------------------------------------------------------------------------------------------------------------------------------------------------------------------------------------------------------------------------------------------------------------------------------------------------|
|                                      |               |    | if too much happens at once, and difficulty in getting started with tasks. Each question can be answered 'yes' or 'no'.                                                                                                                                                                                                                                                                               |
| SPEQ Grandiosity <sup>12,13</sup>    | Self-Report   | 8  | Participants are asked to answer the questions while considering the last month. The questions cover belief in a special mission, having many great ideas, and being more unique than everyone else. Questions are answered on a 0-3 Likert scale.                                                                                                                                                    |
| SPEQ Anhedonia <sup>14</sup>         | Self-Report   | 10 | Participants completed a measure of hedonia, however the items are all reversed so that the items cover <i>anhedonia</i> . Participants are asked to answer the questions in relation to the previous month. The items relate heavily to looking forward to things, such as eating at a restaurant. Questions are answered on a 0-5 Likert scale.                                                     |
| SPEQ Negative Symptoms <sup>15</sup> | Parent Report | 10 | Parents were asked to rate how strongly they agree or disagree with a number of statements in relation to the twins, with no reference to a particular period of time. Items include, among others, lack of emotion, lacking energy or motivation, and having few interests. Questions are answered on a 0-3 Likert scale.                                                                            |
| APSS (CATSS)                         | Self-Report   | 7  | Participants were presented with a number of questions, and asked how often they had experienced various psychotic experiences. These included feeling as though they are being spied on, being sent messages, being conspired against by others, and having visual hallucinations. Questions were not asked with reference to a particular period of time. They were answered on a 0-3 Likert scale. |

*Note that the Exposures were selected on the basis of prior research showing that they are associated with psychotic experiences; the references given are example studies showing that these exposures are linked with psychotic experiences*

## Univariate Twin Models

**eTable 2.** Assumptions Testing

| Model                                 | -2LL     | Parameters | df    | Comparison Model | $\Delta\chi^2$ | $\Delta df$ | p     |
|---------------------------------------|----------|------------|-------|------------------|----------------|-------------|-------|
| <i>APSS</i>                           |          |            |       |                  |                |             |       |
| Fully Saturated                       | 22713.67 | 25         | 8066  | -----            | -----          | -----       | ----- |
| Submodel 1                            | 22715.60 | 21         | 8070  | Fully Saturated  | 1.93           | 4           | 0.748 |
| Submodel 2                            | 22716.62 | 17         | 8074  | Fully Saturated  | 2.95           | 8           | 0.938 |
| Submodel 3                            | 22716.95 | 15         | 8076  | Fully Saturated  | 3.27           | 10          | 0.974 |
| Submodel 4                            | 22718.15 | 13         | 8078  | Fully Saturated  | 4.48           | 12          | 0.973 |
| <i>Environmental Composite, TEDS</i>  |          |            |       |                  |                |             |       |
| Fully Saturated                       | 19372.91 | 45         | 9665  | -----            | -----          | -----       | ----- |
| Submodel 1                            | 19386.38 | 29         | 9681  | Fully Saturated  | 13.47          | 16          | 0.638 |
| Submodel 2                            | 19410.24 | 21         | 9689  | Fully Saturated  | 37.33          | 24          | 0.041 |
| <i>Environmental Composite, CATSS</i> |          |            |       |                  |                |             |       |
| Fully Saturated                       | 54748.31 | 45         | 35573 | -----            | -----          | -----       | ----- |
| Submodel 1                            | 54762.46 | 29         | 35589 | Fully Saturated  | 14.15          | 16          | 0.587 |
| Submodel 2                            | 54785.79 | 21         | 35597 | Fully Saturated  | 37.48          | 24          | 0.039 |

*For the APSS, the assumptions are: equal means across twin order (submodel 1), equal variances across twin order (submodel 2), equal means across zygosity (submodel 3), and equal variances across zygosity (submodel 4). For the environmental composites, the assumptions are: equal thresholds across twin order (submodel 1) and equal thresholds across zygosity (submodel 2).*

**eTable 3.** Twin Correlations

|                               | MZF              | DZF              | MZM              | DZM              | DZOS             |
|-------------------------------|------------------|------------------|------------------|------------------|------------------|
| APSS                          | 0.44 (0.38-0.50) | 0.23 (0.16-0.30) | 0.26 (0.16-0.35) | 0.12 (0.03-0.21) | 0.12 (0.06-0.18) |
| Environmental Exposure, TEDS  | 0.68 (0.63-0.73) | 0.50 (0.43-0.56) | 0.69 (0.64-0.74) | 0.54 (0.47-0.61) | 0.51 (0.46-0.56) |
| Environmental Exposure, CATSS | 0.70 (0.68-0.73) | 0.63 (0.60-0.66) | 0.74 (0.71-0.77) | 0.66 (0.63-0.69) | 0.56 (0.54-0.59) |

*MZF: monozygotic female twins; DZF: dizygotic female twins; MZM: monozygotic male twins; DZM: dizygotic male twins; DZOS: dizygotic opposite-sex twins; APSS: Adolescent Psychotic-Like Symptom Screener*

**eTable 4.** Model Fit Statistics

| Model                    | -2LL     | Parameters | df    | Comparison Model | $\Delta\chi^2$ | $\Delta df$ | p      |
|--------------------------|----------|------------|-------|------------------|----------------|-------------|--------|
| <i>APSS, Self-Report</i> |          |            |       |                  |                |             |        |
| Fully Saturated          | 22713.67 | 25         | 8066  | -----            | -----          | -----       | -----  |
| ACE                      | 22728.88 | 9          | 8082  | Fully Saturated  | 15.21          | 16          | 0.509  |
| ADE                      | 22728.90 | 9          | 8082  | Fully Saturated  | 15.23          | 16          | 0.508  |
| Quan                     | 22729.08 | 8          | 8083  | ACE              | 0.20           | 1           | 0.656  |
| Hom                      | 22745.77 | 5          | 8086  | Quan             | 16.69          | 3           | 0.001  |
| AE                       | 22731.13 | 6          | 8085  | Quan             | 2.05           | 2           | 0.359  |
| CE                       | 22764.91 | 6          | 8085  | Quan             | 35.83          | 2           | <0.001 |
| E                        | 22960.05 | 4          | 8087  | Quan             | 230.97         | 4           | <0.001 |
|                          |          |            |       |                  |                |             |        |
| Fully Saturated          | 19372.91 | 45         | 9665  | -----            | -----          | -----       | -----  |
| ACE                      | 19420.44 | 14         | 9702  | Fully Saturated  | 47.53          | 37          | 0.115  |
| Hom                      | 19421.07 | 11         | 9705  | ACE              | 0.63           | 3           | 0.89   |
| AE                       | 19484.09 | 10         | 9706  | Hom              | 63.02          | 1           | <0.001 |
| CE                       | 19473.48 | 10         | 9706  | Hom              | 52.42          | 1           | <0.001 |
| E                        | 20565.4  | 9          | 9707  | Hom              | 1144.33        | 2           | <0.001 |
|                          |          |            |       |                  |                |             |        |
| Fully Saturated          | 54748.31 | 45         | 35573 | -----            | -----          | -----       | -----  |
| ACE                      | 54801.18 | 14         | 35610 | Fully Saturated  | 52.87          | 37          | 0.044  |
| Hom                      | 54837.58 | 11         | 35613 | ACE              | 36.39          | 3           | <0.001 |
| AE                       | 55303.92 | 10         | 35614 | Hom              | 466.34         | 1           | <0.001 |
| CE                       | 54915.94 | 10         | 35614 | Hom              | 78.37          | 1           | <0.001 |
| E                        | 59112.99 | 9          | 35615 | Hom              | 4275.41        | 2           | <0.001 |

-2LL: fit statistic,  $-2 \times \log$ -likelihood of the data; df: degrees of freedom;  $\Delta\chi^2$ : -2LL discrepancy between models, distributed  $\chi^2$ ;  $\Delta df$ : difference in degrees of freedom between two models, equivalent to the difference in number of parameters between two models; p: p-value for the comparison

between two models; significant values indicate that a nested model fits statistically significantly more poorly than the model it is being compared to, supporting the statistical significance of the parameter(s) dropped from the model. For the APSS, the initial ACE or ADE model was fitted with qualitative sex limitation, then with just quantitative sex limitation ('Quan'). All sex differences were then dropped ('Hom'). Due to low power, only quantitative sex differences were tested for the environmental composites.

**eTable 5. Univariate Model Estimates**

|                          |        | A                | C                | E                |
|--------------------------|--------|------------------|------------------|------------------|
| APSS                     | Female | 0.40 (0.24-0.48) | 0.03 (0.00-0.17) | 0.57 (0.52-0.63) |
|                          | Male   | 0.23 (0.01-0.33) | 0.02 (0.00-0.19) | 0.74 (0.66-0.84) |
| Exposure Variable, TEDS  |        | 0.37 (0.27-0.46) | 0.33 (0.25-0.40) | 0.31 (0.28-0.32) |
| Exposure Variable, CATSS |        | 0.24 (0.19-0.29) | 0.48 (0.44-0.52) | 0.27 (0.26-0.30) |

A: additive genetic influences; C: nonadditive genetic influences; E: nonshared environmental influences; APSS: Adolescent Psychotic-Like Symptoms Screener



## Moderation Results

**eTable 6.** Moderation Estimates

| Measure                   | A Moderation       | C Moderation       | E Moderation       |
|---------------------------|--------------------|--------------------|--------------------|
| Paranoia                  | -0.03 (-0.08-0.02) | 0.01 (-0.09-0.11)  | -0.01 (-0.04-0.01) |
| Hallucinations            | 0.02 (-0.06-0.08)  | 0.00 (-0.09-0.10)  | 0.03 (0.00-0.06)   |
| Cognitive Disorganization | -0.02 (-0.07-0.03) | 0.00 (-0.13-0.13)  | 0.05 (0.02-0.08)   |
| Grandiosity               | -0.01 (-0.09-0.04) | 0.09 (-0.06-0.06)  | 0.03 (0.00-0.06)   |
| Anhedonia                 | 0.00 (-0.06-0.05)  | -0.07 (-0.18-0.18) | 0.04 (0.01-0.07)   |
| Negative Symptoms         | 0.02 (-0.03-0.07)  | 0.02 (-0.08-0.10)  | 0.01 (-0.01-0.03)  |
| APSS in CATSS             | 0.03 (-0.05-0.11)  | 0.10 (-0.20-0.20)  | 0.05 (0.01-0.10)   |

**eTable 7.** Estimates From the Moderation Models

|                       | A Variance       | C Variance       | E Variance       | Total Variance   | Proportion A     | Proportion C     | Proportion E     |
|-----------------------|------------------|------------------|------------------|------------------|------------------|------------------|------------------|
| <i>Paranoia</i>       |                  |                  |                  |                  |                  |                  |                  |
| 0                     | 0.44 (0.32-0.53) | 0.05 (0.00-0.13) | 0.50 (0.46-0.54) | 0.99 (0.92-1.04) | 0.44 (0.33-0.53) | 0.05 (0.00-0.14) | 0.51 (0.47-0.56) |
| 1                     | 0.40 (0.30-0.49) | 0.05 (0.00-0.12) | 0.48 (0.45-0.52) | 0.93 (0.87-0.97) | 0.43 (0.33-0.51) | 0.05 (0.00-0.13) | 0.52 (0.48-0.57) |
| 2                     | 0.36 (0.23-0.47) | 0.05 (0.00-0.14) | 0.47 (0.41-0.53) | 0.87 (0.79-0.94) | 0.41 (0.27-0.52) | 0.05 (0.00-0.16) | 0.54 (0.47-0.61) |
| 3                     | 0.32 (0.17-0.48) | 0.04 (0.00-0.19) | 0.45 (0.37-0.54) | 0.82 (0.70-0.91) | 0.39 (0.20-0.55) | 0.05 (0.00-0.23) | 0.55 (0.45-0.67) |
| 4                     | 0.29 (0.11-0.50) | 0.04 (0.00-0.26) | 0.43 (0.33-0.56) | 0.76 (0.62-0.90) | 0.38 (0.14-0.58) | 0.05 (0.00-0.31) | 0.57 (0.42-0.73) |
| <i>Hallucinations</i> |                  |                  |                  |                  |                  |                  |                  |
| 0                     | 0.30 (0.19-0.40) | 0.10 (0.02-0.19) | 0.54 (0.50-0.58) | 0.94 (0.89-0.98) | 0.32 (0.21-0.42) | 0.11 (0.03-0.20) | 0.57 (0.53-0.62) |
| 1                     | 0.31 (0.21-0.41) | 0.10 (0.03-0.18) | 0.58 (0.54-0.63) | 1.00 (0.96-1.03) | 0.31 (0.21-0.41) | 0.10 (0.03-0.18) | 0.58 (0.54-0.63) |
| 2                     | 0.33 (0.18-0.48) | 0.10 (0.01-0.22) | 0.63 (0.55-0.71) | 1.06 (0.98-1.12) | 0.31 (0.17-0.44) | 0.09 (0.01-0.21) | 0.59 (0.52-0.67) |

|                                  |                  |                  |                  |                  |                  |                  |                  |
|----------------------------------|------------------|------------------|------------------|------------------|------------------|------------------|------------------|
| 3                                | 0.35 (0.14-0.58) | 0.10 (0.00-0.29) | 0.67 (0.56-0.80) | 1.12 (1.01-1.23) | 0.31 (0.12-0.49) | 0.09 (0.00-0.25) | 0.60 (0.49-0.71) |
| 4                                | 0.37 (0.10-0.70) | 0.10 (0.00-0.39) | 0.72 (0.56-0.90) | 1.18 (1.03-1.35) | 0.31 (0.08-0.54) | 0.08 (0.00-0.30) | 0.61 (0.46-0.75) |
| <i>Cognitive Disorganisation</i> |                  |                  |                  |                  |                  |                  |                  |
| 0                                | 0.44 (0.35-0.48) | 0.00 (0.00-0.06) | 0.50 (0.46-0.54) | 0.93 (0.89-0.97) | 0.47 (0.38-0.51) | 0.00 (0.00-0.07) | 0.53 (0.49-0.58) |
| 1                                | 0.42 (0.32-0.47) | 0.00 (0.00-0.07) | 0.57 (0.53-0.61) | 0.99 (0.95-1.02) | 0.43 (0.33-0.46) | 0.00 (0.00-0.07) | 0.57 (0.54-0.62) |
| 2                                | 0.41 (0.26-0.49) | 0.00 (0.00-0.12) | 0.65 (0.58-0.72) | 1.05 (0.99-1.11) | 0.39 (0.25-0.45) | 0.00 (0.00-0.11) | 0.61 (0.55-0.68) |
| 3                                | 0.39 (0.19-0.52) | 0.00 (0.00-0.20) | 0.73 (0.61-0.86) | 1.12 (1.02-1.22) | 0.35 (0.17-0.45) | 0.00 (0.00-0.17) | 0.65 (0.55-0.75) |
| 4                                | 0.38 (0.14-0.56) | 0.00 (0.00-0.32) | 0.81 (0.65-1.01) | 1.19 (1.06-1.38) | 0.32 (0.11-0.45) | 0.00 (0.00-0.24) | 0.68 (0.54-0.81) |
| <i>Grandiosity</i>               |                  |                  |                  |                  |                  |                  |                  |
| 0                                | 0.41 (0.30-0.52) | 0.09 (0.00-0.18) | 0.51 (0.47-0.56) | 1.01 (0.95-1.05) | 0.41 (0.29-0.52) | 0.09 (0.00-0.18) | 0.51 (0.47-0.56) |
| 1                                | 0.39 (0.30-0.46) | 0.04 (0.00-0.11) | 0.55 (0.52-0.59) | 0.98 (0.93-1.02) | 0.39 (0.30-0.46) | 0.04 (0.00-0.11) | 0.56 (0.53-0.61) |
| 2                                | 0.36 (0.22-0.46) | 0.01 (0.00-0.11) | 0.60 (0.53-0.67) | 0.97 (0.90-1.03) | 0.37 (0.23-0.46) | 0.01 (0.00-0.11) | 0.61 (0.54-0.69) |
| 3                                | 0.34 (0.15-0.49) | 0.00 (0.00-0.13) | 0.64 (0.53-0.77) | 0.99 (0.87-1.09) | 0.35 (0.15-0.47) | 0.00 (0.00-0.14) | 0.65 (0.53-0.78) |
| 4                                | 0.32 (0.09-0.53) | 0.01 (0.00-0.16) | 0.69 (0.53-0.88) | 1.02 (0.85-1.21) | 0.32 (0.09-0.48) | 0.01 (0.00-0.14) | 0.68 (0.49-0.86) |
| <i>Anhedonia</i>                 |                  |                  |                  |                  |                  |                  |                  |
| 0                                | 0.47 (0.40-0.52) | 0.00 (0.00-0.05) | 0.49 (0.45-0.53) | 0.96 (0.91-0.99) | 0.49 (0.42-0.53) | 0.00 (0.00-0.05) | 0.51 (0.47-0.56) |
| 1                                | 0.47 (0.39-0.52) | 0.00 (0.00-0.05) | 0.55 (0.51-0.59) | 1.02 (0.97-1.06) | 0.46 (0.39-0.50) | 0.00 (0.00-0.05) | 0.54 (0.50-0.58) |
| 2                                | 0.47 (0.33-0.57) | 0.01 (0.00-0.13) | 0.61 (0.54-0.69) | 1.10 (1.01-1.17) | 0.43 (0.30-0.51) | 0.01 (0.00-0.11) | 0.56 (0.49-0.63) |
| 3                                | 0.48 (0.27-0.64) | 0.03 (0.00-0.25) | 0.68 (0.56-0.82) | 1.19 (1.03-1.32) | 0.40 (0.22-0.52) | 0.03 (0.00-0.20) | 0.57 (0.46-0.69) |

|                          |                  |                  |                  |                  |                  |                  |                  |
|--------------------------|------------------|------------------|------------------|------------------|------------------|------------------|------------------|
| 4                        | 0.48 (0.21-0.72) | 0.06 (0.00-0.44) | 0.75 (0.58-0.95) | 1.29 (1.06-1.55) | 0.37 (0.15-0.54) | 0.05 (0.00-0.30) | 0.58 (0.42-0.75) |
| <i>Negative Symptoms</i> |                  |                  |                  |                  |                  |                  |                  |
| 0                        | 0.59 (0.52-0.67) | 0.20 (0.11-0.27) | 0.16 (0.15-0.18) | 0.96 (0.92-1.00) | 0.62 (0.55-0.71) | 0.21 (0.12-0.28) | 0.17 (0.16-0.19) |
| 1                        | 0.63 (0.57-0.70) | 0.20 (0.14-0.26) | 0.17 (0.16-0.18) | 1.00 (0.96-1.04) | 0.63 (0.57-0.70) | 0.20 (0.14-0.26) | 0.17 (0.16-0.18) |
| 2                        | 0.68 (0.55-0.80) | 0.20 (0.09-0.34) | 0.18 (0.15-0.20) | 1.05 (0.98-1.13) | 0.64 (0.52-0.75) | 0.19 (0.09-0.32) | 0.17 (0.14-0.19) |
| 3                        | 0.72 (0.51-0.93) | 0.20 (0.05-0.45) | 0.18 (0.14-0.23) | 1.10 (0.99-1.23) | 0.65 (0.45-0.81) | 0.18 (0.05-0.39) | 0.16 (0.13-0.21) |
| 4                        | 0.77 (0.48-1.07) | 0.20 (0.02-0.59) | 0.19 (0.14-0.25) | 1.16 (1.00-1.35) | 0.66 (0.38-0.85) | 0.17 (0.02-0.46) | 0.16 (0.11-0.22) |
| <i>APSS</i>              |                  |                  |                  |                  |                  |                  |                  |
| 0                        | 0.31 (0.20-0.38) | 0.01 (0.00-0.08) | 0.56 (0.51-0.63) | 0.88 (0.82-0.92) | 0.35 (0.23-0.43) | 0.01 (0.00-0.09) | 0.64 (0.57-0.72) |
| 1                        | 0.34 (0.26-0.40) | 0.00 (0.00-0.05) | 0.65 (0.60-0.70) | 0.99 (0.95-1.04) | 0.35 (0.27-0.39) | 0.00 (0.00-0.05) | 0.65 (0.61-0.70) |
| 2                        | 0.38 (0.22-0.50) | 0.01 (0.00-0.13) | 0.74 (0.64-0.85) | 1.14 (1.05-1.20) | 0.33 (0.20-0.43) | 0.01 (0.00-0.11) | 0.65 (0.57-0.75) |
| 3                        | 0.42 (0.18-0.64) | 0.05 (0.00-0.28) | 0.84 (0.67-1.03) | 1.31 (1.14-1.46) | 0.32 (0.13-0.48) | 0.04 (0.00-0.20) | 0.64 (0.50-0.79) |
| 4                        | 0.46 (0.14-0.82) | 0.10 (0.00-0.52) | 0.94 (0.70-1.23) | 1.50 (1.23-1.81) | 0.31 (0.09-0.52) | 0.07 (0.00-0.30) | 0.63 (0.44-0.84) |

*A variance, C variance, and E variance represent the decomposition of the total variance into three components. The proportions are the proportion of total variance explained by each component, and were calculated by dividing each component by the total variance.*

## eReferences

1. Arseneault L, Cannon M, Fisher HL, Polanczyk G, Moffitt TE, Caspi A. Childhood trauma and children's emerging psychotic symptoms. *Am J Psychiatry*. 2011;168(1):65-72. <http://search.ebscohost.com/login.aspx?direct=true&db=psyh&AN=2011-02156-012&lang=de&site=ehost-live%0Aorcid:0000-0002-8589-6760%0Aorcid:0000-0003-4174-2126>
2. Shakoor S, Mcguire P, Cardno AG, Freeman D, Plomin R, Ronald A. A Shared Genetic Propensity Underlies Experiences of Bullying Victimization in Late Childhood and Self-Rated Paranoid Thinking in Adolescence. *Schizophr Bull*. 2015;41(3):754-763. doi:10.1093/schbul/sbu142
3. Kelleher I, Keeley H, Corcoran P, et al. Childhood trauma and psychosis in a prospective cohort study: Cause, effect, and directionality. *Am J Psychiatry*. 2013;170(7):734-741. doi:10.1176/appi.ajp.2012.12091169
4. Shakoor S, Zavos HMS, Haworth CMA, et al. Association between stressful life events and psychotic experiences in adolescence: Evidence for gene–environment correlations. *Br J Psychiatry*. 2016;208(6):532-538. doi:10.1192/bjp.bp.114.159079
5. Fusar-Poli P, Tantardini M, De Simone S, et al. Deconstructing vulnerability for psychosis: Meta-analysis of environmental risk factors for psychosis in subjects at ultra high-risk. *Eur Psychiatry*. 2017;40:65-75. doi:10.1016/j.eurpsy.2016.09.003
6. Barkhuizen W, Taylor MJ, Freeman D, Ronald A. A Twin Study on the Association Between Psychotic Experiences and Tobacco Use During Adolescence. *J Am Acad Child Adolesc Psychiatry*. 2019;58(2):267-276.e8. doi:10.1016/j.jaac.2018.06.037
7. Morgan C, Reininghaus U, Reichenberg A, Frissa S, Hotopf M, Hatch SL. Adversity, cannabis use and psychotic experiences: Evidence of cumulative and synergistic effects. *Br J Psychiatry*. 2014;204(5):346-353. doi:10.1192/bjp.bp.113.134452
8. Harley M, Kelleher I, Clarke M, et al. Cannabis use and childhood trauma interact additively to increase the risk of psychotic symptoms in adolescence. *Psychol Med*. 2010;40(10):1627-1634. doi:10.1017/S0033291709991966
9. Shakoor S, Zavos HMS, McGuire P, Cardno AG, Freeman D, Ronald A. Psychotic experiences are linked to cannabis use in adolescents in the community because of common underlying environmental risk factors. *Psychiatry Res*. 2015;227(2-3):144-151. doi:10.1016/J.PSYCHRES.2015.03.041
10. Freeman D, Garety PA, Bebbington PE, et al. Psychological investigation of the structure of paranoia in a non-clinical population. *Br J Psychiatry*. 2005;186(MAY):427-435. doi:10.1192/BJP.186.5.427
11. Bell V, Halligan PW, Ellis HD. The Cardiff Anomalous Perceptions Scale (CAPS): A New Validated Measure of Anomalous Perceptual Experience. doi:10.1093/schbul/sbj014
12. Mason O, Linney Y, Claridge G. Short scales for measuring schizotypy. *Schizophr Res*. 2005;78(2-3):293-296. doi:10.1016/J.SCHRES.2005.06.020
13. Peters E, Joseph S, Day S, Garety P. *Measuring Delusional Ideation: The 21-Item Peters et AL Delusions Inventory (PDI)*. <https://academic.oup.com/schizophreniabulletin/article/30/4/1005/1930847>
14. Gard DE, Gard MG, Kring AM, John OP. Anticipatory and consummatory components of the experience of pleasure: A scale development study. *J Res Pers*. 2006;40(6):1086-1102. doi:10.1016/J.JRP.2005.11.001
15. Andreasen N. *The Scale for the Assessment of Negative Symptoms (SANS)*. Iowa: University of Iowa, 1984.
